# Supplementary material for: Investigation of muscle transcriptomes using gradient boosting machine learning identifies molecular predictors of feed efficiency in growing pigs
Source: PubMed Central journal article supplement (PMC6697907; doi:10.1186/s12864-019-6010-9), 2019-08-17
Supplement: 12864_2019_6010_MOESM5_ESM.pdf [file 12864_2019_6010_MOESM5_ESM.pdf]

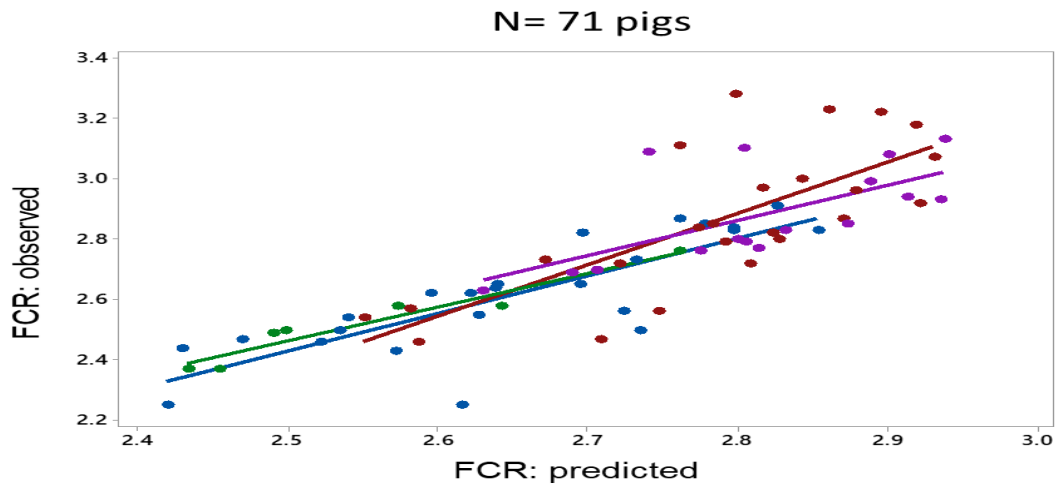

Legend: Plot of observed and predicted FCR (feed conversion ratio) values, with pigs labelled according to their genetic line (RFI, residual feed intake) and experiments (datasets 1 or 2). Slopes are indicated, together with coefficients of regression (into brackets).  $R^2 = 0.70$  when evaluated in the 71 pigs. Labels : green dot: low RFI pigs – dataset 1 ( $R^2 = 0.93$ ); purple dot: high RFI pigs – dataset 1 ( $R^2 = 0.43$ ); blue dot: low RFI pigs – dataset 2 ( $R^2 = 0.67$ ) ; red dot: high RFI pigs – dataset 2 ( $R^2 = 0.53$ ).

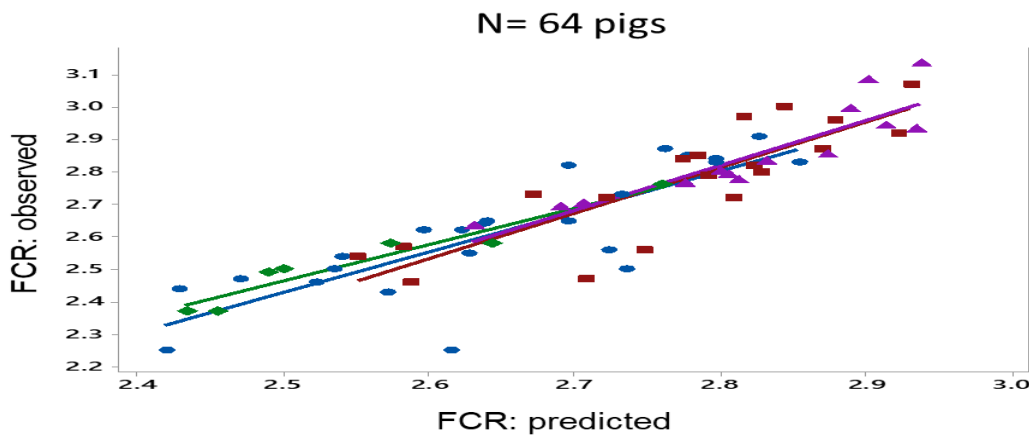

Legend: Plot of observed and predicted FCR (feed conversion ratio) values, with pigs labelled according to their genetic line (RFI, residual feed intake) and experiments (datasets 1 or 2). Slopes are indicated, together with coefficients of regression (into brackets).  $R^2 = 0.80$  when evaluated in the 64 pigs. Labels: green diamond: low RFI pigs – dataset 1 ( $R^2 = 0.92$ ); purple triangle : high RFI pigs – dataset 1 ( $R^2 = 0.81$ ); blue dot : low RFI pigs – dataset 2 ( $R^2 = 0.67$ ); red square: high RFI pigs – dataset 2 ( $R^2 = 0.72$ ).

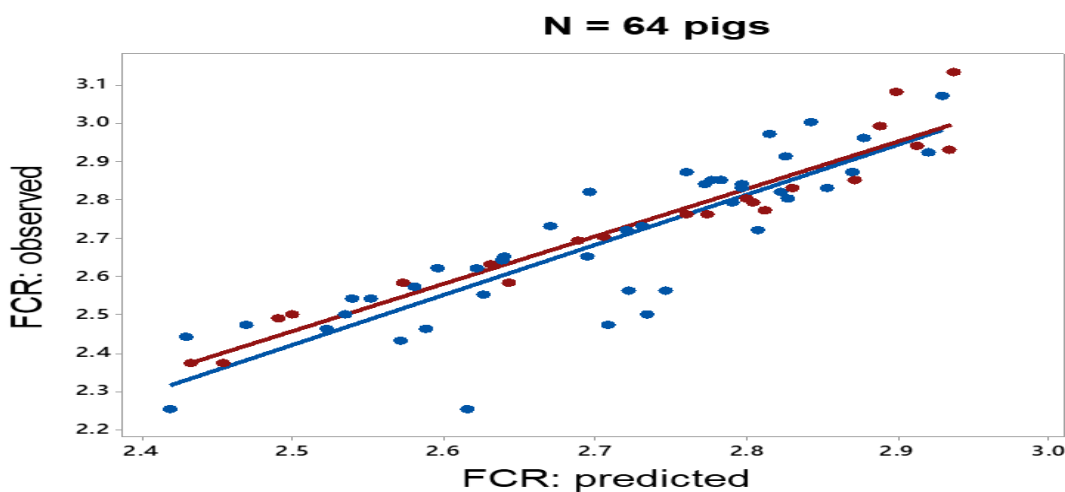

Legend: Plot of observed and predicted FCR (feed conversion ratio) values, with pigs labelled according to dataset of origin. Slopes are indicated together with coefficients of regression (into brackets).  $R^2 = 0.80$  when evaluated in the 64 pigs. Labels: red dot: dataset 1 ( $R^2 = 0.93$ ) – blue dot: dataset 2 ( $R^2 = 0.73$ ).
